# Supplementary material for: Postcranial evidence from early Homo from Dmanisi, Georgia
Source: Springer Nature journal article supplement (doi:10.1038/nature06134), 2007-09-01
Supplement: 41586_2007_BFnature06134_MOESM9_ESM.pdf [file 41586_2007_BFnature06134_MOESM9_ESM.pdf]

## S1. Stratigraphy and new paleomagnetic data

Sediments in Block 2 above the 1.85 Ma Masavera Basalt are divided into two major stratigraphic units (see Fig. S1). Stratum A consists of a series of at least four separate ashfalls that conformably overlie the basalt. Stratum B deposits include horizontally extensive ashfalls, as well as a complex of deposits that filled pipes and the gullies that formed along collapsed pipes. The hominin remains in Block 2 were stratified within three subunits of Stratum B1, indicating a discrete sequence of accumulation. The first hominin bones were deposited in the lowest pipe-gully deposits of Stratum B1y, which overlies an erosional disconformity with Stratum A1. These are overlain by Stratum B1x, with numerous hominin bones that were gently scattered and quickly buried along the axis of the gully that formed along the W-E pipe axis. The superjacent gully fill (Stratum B1z), which contains one hominin remain, accumulated along a N-S axis.

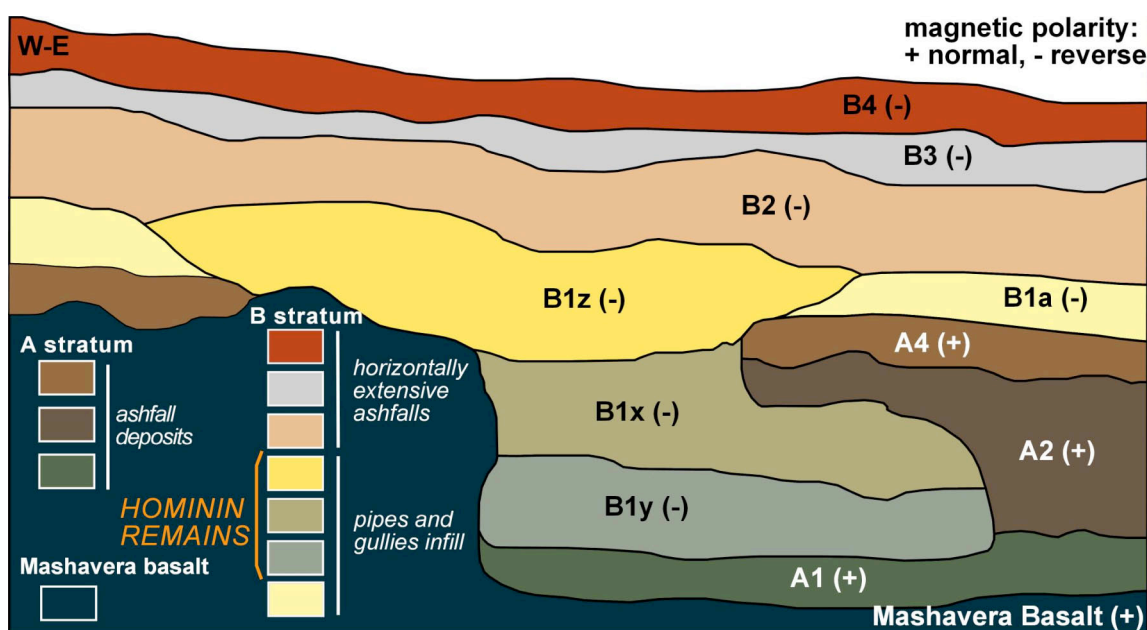

**Supplementary Figure S1.** Block 2 stratigraphic units, with indication of the units where hominin remains were found. Section is 10 m long, with ca. 1.8x vertical exaggeration.

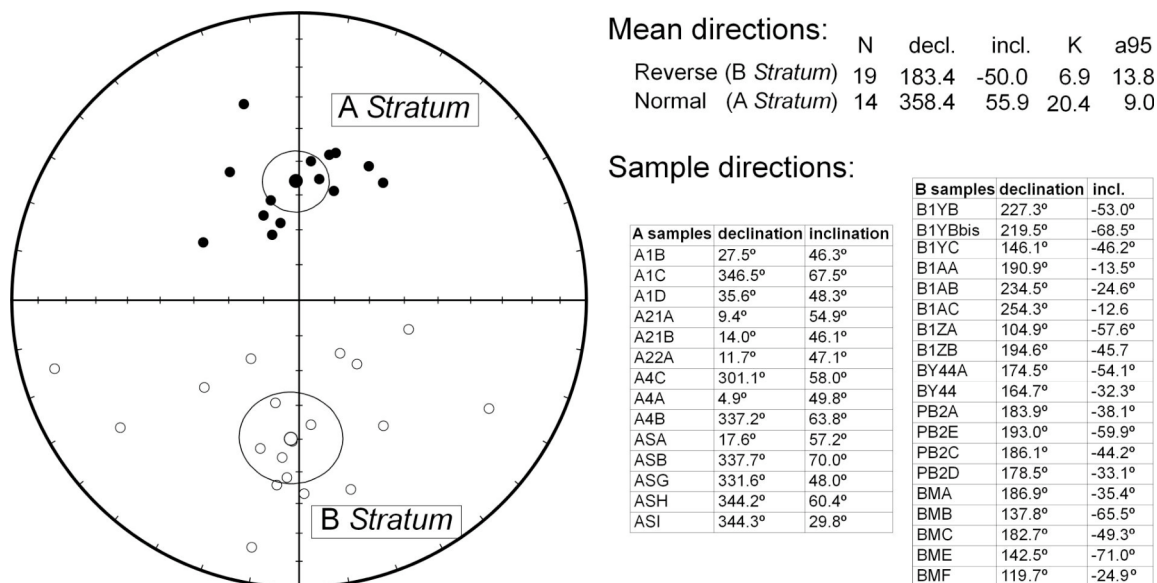

**Supplementary Figure S2.** Individual characteristic remnant magnetization values. Left: stereographic plot (open and filled dots belong to the southern and northern hemisphere, respectively). Tables: values per sample. Note that all samples from A stratum display northern declinations and positive inclinations. Conversely, B stratum samples are southwards directed and show negative inclinations. Thus, A and B stratum display normal and reverse polarities, respectively. N=number of samples, decl. = declination, incl.= inclination, K and a95 = Fisher statistic values.

The upper part of the Stratum A deposits exhibit weak pedogenic features, and the contact between A and B is a minor erosional disconformity. The first paleomagnetic analyses of Block 2 deposits (see Figs. S1 and S2) revealed that all of the Stratum A deposits in Block 2 exhibit normal geomagnetic polarity, while all of the Stratum B1y to B2 deposits exhibit reversed polarity (adjacent to Block 2, B3 and B4 also display reversed polarity). These new data are fully concordant with the initial stratigraphic and paleomagnetic studies of Block 1<sup>2</sup>. Despite this change of polarity, the presence of the same rodent species of the genera *Cricetulus* and *Parameriones* in both A and B1y strata confirms that there is not a significant chronological gap between them.

## S2. Fauna and biostratigraphy

Apart from the hominin record, the Dmanisi fossil vertebrate assemblage (Table S1) comprises so far remains of 44 taxa of amphibians (1), reptiles (3), birds (3) and mammals (37). Most of the micromammal species from Dmanisi correspond to typical Late Pliocene forms, such as *Mimomys pliocaenicus* and *Tcharinomys tornensis*, two characteristic voles of the Villanyian small mammal age (equivalent to the Tiglian). The large mammal association of Dmanisi reflects the time span of transition from Middle to Late Villafranchian in character. Several of the recorded elements are well known from Late Pliocene contexts in western Asia and Europe: *Pliocrocuta perrieri*, *Mammuthus meridionalis* (typical form), *Eucladoceros* aff. *tegulensis*, *Palaeotragus*, *Gallogoral meneghinii sickenbergii*. More modern forms are represented by, e.g., *Cervus* (*Pseudodama*) cf. *nestii*, *Bison* (*Eobison*) *georgicus*, and *Pontoceros* sp. The absence of raccoon dog (*Nyctereutes*) within the huge amount of recorded fossils could support the idea of a slightly younger than Middle Villafranchian mammal age.

Supplementary Table S1. Faunal list of the Dmanisi site

| Class    | Order              | Family              | Genus                  | Species                                       |
|----------|--------------------|---------------------|------------------------|-----------------------------------------------|
| Amphibia |                    |                     |                        |                                               |
|          | Anura              | Bufo                | <i>Bufo</i>            | <i>viridis</i>                                |
| Reptilia |                    |                     |                        |                                               |
|          | <i>Testudinata</i> | <i>Testudinidae</i> | <i>Testudo</i>         | <i>graeca</i>                                 |
|          | <i>Squamata</i>    | <i>Lacertidae</i>   | <i>Lacerta</i>         | <i>ex. gr. viridis</i>                        |
|          |                    | <i>Colubridae</i>   | <i>cf. Elaphe</i>      | <i>quatuorlineata</i>                         |
| Aves     |                    |                     |                        |                                               |
|          | Struthioniformes   | Struthionidae       | <i>Struthio</i>        | <i>dmanisensis</i>                            |
|          | Galliformes        | Gallidae            | <i>Gallus</i>          | <i>dmanisiensis</i>                           |
|          | Strigiformes       | Strigidae           | <i>Strix</i>           | <i>gigas</i>                                  |
| Mammalia |                    |                     |                        |                                               |
|          | Insectivora        | Soricidae           | <i>Sorex</i>           | sp.                                           |
|          | Lagomorpha         | Ochotonidae         | <i>cf. Ochotona</i>    | <i>lagreli</i>                                |
|          |                    | Leporidae           | <i>cf. Hypolagus</i>   | <i>brachygnathus</i>                          |
|          | Rodentia           | Muridae             | <i>Apodemus</i>        | aff. <i>atavus</i>                            |
|          |                    | Cricetidae          | <i>Cricetulus</i>      | sp.                                           |
|          |                    | Arvicolidae         | <i>Tcharinomys</i>     | <i>tornensis</i>                              |
|          |                    |                     | <i>Mimomys</i>         | <i>pliocaenicus</i>                           |
|          |                    | Gerbillidae         | <i>Parameriones</i>    | aff. <i>obeidiensis</i>                       |
|          |                    | Hystriidae          | <i>Hystrix</i>         | <i>refossa</i>                                |
|          | Carnivora          | Canidae             | <i>Canis</i>           | <i>etruscus</i>                               |
|          |                    |                     | <i>Vulpes</i>          | <i>alopeoides</i>                             |
|          |                    | Ursidae             | <i>Ursus</i>           | <i>etruscus</i>                               |
|          |                    |                     | <i>Ursus</i>           | sp.                                           |
|          |                    | Mustelidae          | <i>Martes</i>          | sp.                                           |
|          |                    |                     | <i>Meles</i>           | sp.                                           |
|          |                    | Hyaenidae           | <i>Pliocrocota</i>     | <i>perrieri</i>                               |
|          |                    |                     | <i>Pachycrocota</i>    | sp.                                           |
|          |                    | Felidae             | <i>Lynx</i>            | <i>issiodorensis</i>                          |
|          |                    |                     | <i>Acinonyx</i>        | <i>pardinensis</i>                            |
|          |                    |                     | <i>Panthera</i>        | <i>onca</i> ssp.(=                            |
|          |                    |                     | <i>Megantereon</i>     | <i>megantereon</i>                            |
|          |                    |                     | <i>Homotherium</i>     | <i>crenatidens</i>                            |
|          | Proboscidea        | Elephantidae        | <i>Mammuthus</i>       | <i>meridionalis</i>                           |
|          | Perissodactyla     | Equidae             | <i>Equus</i>           | <i>stenonis</i>                               |
|          |                    |                     | <i>Equus</i>           | aff. <i>altidens</i>                          |
|          |                    | Rhinocerotidae      | <i>Stephanorhinus</i>  | <i>etruscus</i>                               |
|          | Artiodactyla       | Cervidae            | <i>Cervus</i>          | cf. <i>nestii</i>                             |
|          |                    |                     | <i>Cervus</i>          | <i>abesalomi</i>                              |
|          |                    |                     | <i>Eucladoceros</i>    | aff. <i>tegulensis</i> (= <i>senezensis</i> ) |
|          |                    | Giraffidae          | <i>Palaeotragus</i>    | sp.                                           |
|          |                    | Bovidae             | <i>Bison (Eobison)</i> | <i>georgicus</i>                              |
|          |                    |                     | <i>Gallogoral</i>      | <i>meneghinii sickenbergii</i>                |
|          |                    |                     | <i>Capra</i>           | <i>dalii</i>                                  |
|          |                    |                     | <i>Soergelia</i>       | cf. <i>minor</i>                              |
|          |                    |                     | Ovibovini indet.       |                                               |
|          |                    |                     | <i>Pontoceros</i>      | sp.                                           |
|          |                    |                     | Antilopini indet.      |                                               |

### S3. Palaeozoogeography

According to Fortelius *et al.*<sup>51</sup> the genus-level faunal resemblance index is calculated using both Simpson's<sup>52</sup> and Dice's<sup>53</sup> faunal resemblance indexes. The Dice index is the one most highly recommended by Archer and Maples<sup>54</sup> and Maples and Archer<sup>55</sup> and is calculated as  $2A / (2A + B + C)$ , where A is the number of taxa present in both faunas, B is the number of taxa present in fauna 1, but absent in fauna 2, and C is the number of taxa present in fauna 2 but absent in fauna 1. Simpson's faunal resemblance index (calculated as  $A / (A + E)$ , where E is the smaller of B or C) has a long tradition of use in studies of similarity of fossil mammals<sup>56-58</sup> and is coupled with Dice index in Figure S3.

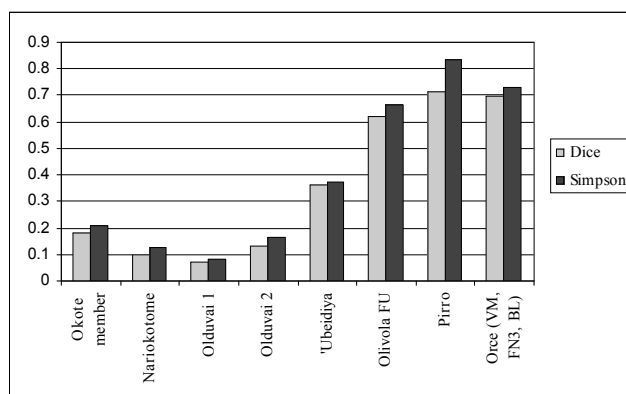

**Supplementary Figure S3.** Genus-level faunal comparison of Dmanisi large mammals assemblage with various Plio-Pleistocene assemblages from Africa, the Near East and Europe showing that Dmanisi has resemblance values with European Late Villafranchian mammal faunas. Data source updated by one of us (LR) from Turner *et al.*,<sup>59</sup> and from the Neogene of the Old World Database of Fossil Mammals (NOW public release 030717, [www.helsinki.fi/science/now/](http://www.helsinki.fi/science/now/)).

The highest similarity values of the Dmanisi faunal assemblage are with W-European "Late Villafranchian" assemblages, while the "African" mammal faunas show very low GFRI values. Similarities between Dmanisi and African assemblages are mainly due to the co-occurrence of common carnivore genera (e.g. *Homotherium*, *Megantereon*, *Panthera*) or, among herbivores, widespread genera like *Equus*.

## S4. Palaeoecology

The combination of topographic and vertebrate palaeontological information allows to infer a differentiated landscape pattern. Over a distance of a few kilometres, the landscape character changed from a flat and fairly wet river valley with gallery forests (indicated especially by the frequently recorded *Eucladoceros* and the elaphine deer *Cervus abesalomi*) to flanking slopes with shrub vegetation of varying densities, turning into dry meadows in the southerly exposed areas with more intense insolation. Extended tree savannah to open grasslands characterised the higher ground out of the valley. In addition to savannahs, semidesert-like rocky terrains existed on the lava outcrops in the vicinity of the site. *Testudo graeca* and *Hystrix refossa* indicate temperate climatic parameters.

**Supplementary Table S2. Ecological characteristics of selected taxa and Dmanisi site inferred landscape**

| dense to open forests and shrub landscapes                    | tree savannah and open grasslands | rocky, semi-arid terrains    |
|---------------------------------------------------------------|-----------------------------------|------------------------------|
| <i>Eucladoceros</i> aff. <i>tegulensis</i> (= <i>E.</i> aff.) | cf. <i>Ochotona lagreli</i>       | <i>Capra dalii</i>           |
| <i>Cervus (Pseudodama)</i> cf. <i>nestii</i>                  | <i>Parameriones</i> aff.          | <i>Gallogoral meneghinii</i> |
| <i>Meles</i> sp.                                              |                                   |                              |
| <i>Sorex</i> sp.                                              | Antilopini indet.                 |                              |
| <i>Apodemus</i> aff. <i>atavus</i>                            | <i>Equus</i> aff. <i>altidens</i> |                              |
| <i>Bison (Eobison)</i> <i>georgicus</i> (most probably)       |                                   |                              |
| <i>Strix gigas</i> (most probably)                            |                                   |                              |
| <i>Stephanorhinus etruscus</i> (partly)                       | <i>Stephanorhinus etruscus</i>    |                              |
| <i>Mammuthus meridionalis</i> (partly)                        | <i>Mammuthus meridionalis</i>     |                              |

## S5. Taphonomy

The Dmanisi large mammal assemblage is well preserved with little subaerial weathering. 72% of specimens are in weathering stage 0, 21% in stage 1, and 5% in stage 2<sup>60, 61</sup>. This signal, along with the presence of several articulated body segments, indicates rapid burial after death. Post-burial surface damage such as fungal/root etching is common.

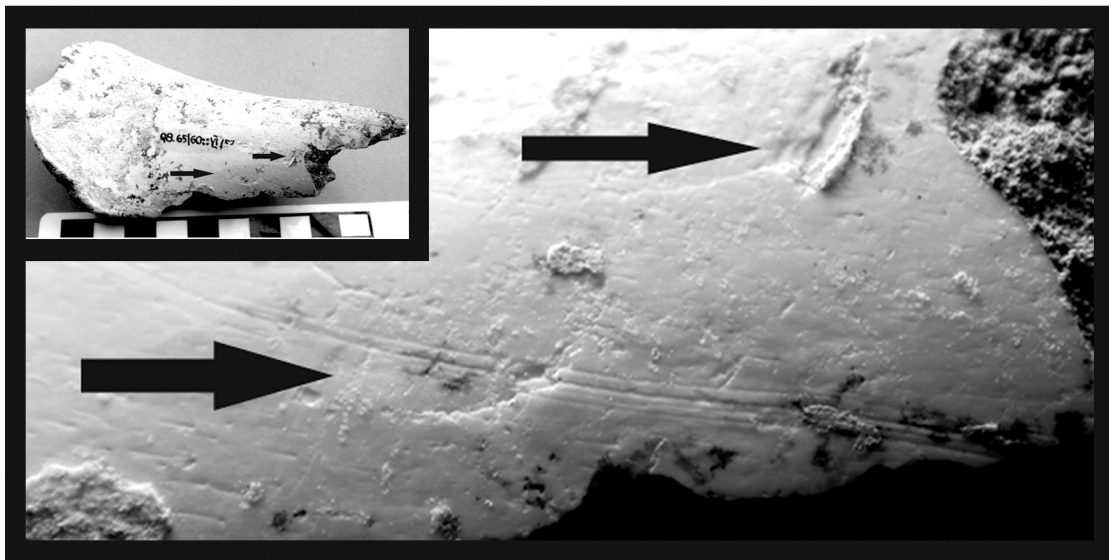

**Supplementary Figure S4.** Shaft fragment of a mammal size class 3 humerus with stone tool cut mark found under calcrete (lower arrow; size classes after<sup>62</sup>). A pit from either a hammerstone, or carnivore (upper arrow). The lack of striations in the pit suggests it is a carnivore tooth mark, which would appear to document that a carnivore broke the bone open for marrow after hominins consumed the meat. Scale bar is in cm.

One third of plotted bone specimens are unbroken. Of breaks, 50% have curved morphology and acute angles, and 21% are intermediate in form, indicating breakage while the bone was still fresh, rather than after fossilization such as breaking due to transport or crushing by sediments<sup>63</sup>. In addition, the absence of trample marks or other evidence of transport, suggests that most of the bones were broken during consumption.

Stone tool marks are rare, observable on less than 1% of the assemblage (see Figs. S4 and S5), but their presence does indicate that the hominins were eating meat, and with the presence of the multiple stone tools and manuports, they indicate that hominins were living in the direct vicinity of the site. The presence of cutmarks on a few mid-shaft upper limb bones (humerus/femur) indicates the hominins were filleting meat, and that a large carnivore such as a felid or hyaenid did not consume the meat first, and therefore that hominins had early access to carcasses. Carnivore tooth marks are present in higher frequencies in the assemblage than tool marks, and are on about 8-9% of the bones; hyena and other carnivore coprolites are also present. The small amount of carnivore damage is less than expected if bone-crushing hyenas accumulated the hominin bones.<sup>64, 65</sup> Like the mammals, most of the hominin fossils exhibit no subaerial weathering and very little other damage. The presence of skeletal elements that almost never survive carnivore consumption, such as the 3 clavicles, first ribs, and patella, suggests that the hominins were not consumed by large carnivores<sup>66, 67</sup>.

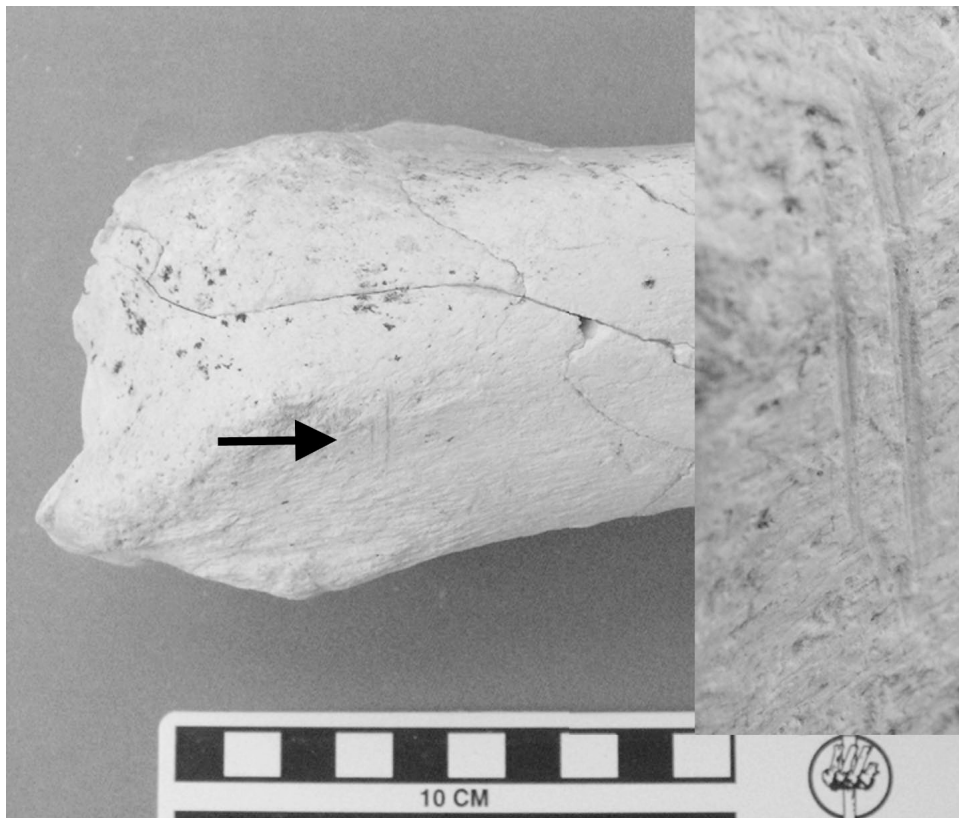

**Supplementary Figure S5.** *Bison (Eobison) georgicus* distal radius with a striated cut mark (1x14.9 mm) running perpendicular to the long axis.



## S6. Dmanisi hominin postcranial material of subadult individual

**Supplementary Table S3. Assessment of developmental stage of subadult cranial and postcranial hominin elements**

| Dmanisi palaeontological nr. | bone          | developmental stage markers                                                                             | modern human developmental age (y) <sup>1</sup> |
|------------------------------|---------------|---------------------------------------------------------------------------------------------------------|-------------------------------------------------|
| D2700                        | cranium       | third molar root 30%; sphenoccipital synchondrosis unfused                                              | <15                                             |
| D2735                        | mandible      | agenesis of left third molar; germ of right third molar is missing                                      | -                                               |
| D2724                        | clavicle      |                                                                                                         | -                                               |
| D2715 and D2680              | humerus       | two out of seven secondary points of ossification are unfused: medial epicondyle and proximal epiphyses | females: 13-17<br>males: 14-20                  |
| D2721; D2673; D2713; D2627   | vertebrae     | no annular epiphyseal fusion                                                                            | females: 18<br>males: 18.9                      |
| D2679; D2670; D3480          | phalanges     | epiphyseal fusion                                                                                       | females: 11-13<br>males: 14-16                  |
| D2671                        | metatarsal I  | epiphyseal fusion incomplete                                                                            | females: 13-15<br>males: 16-18                  |
| D2669                        | metatarsal IV | epiphyseal fusion                                                                                       | females: 11-13<br>males: 14-16                  |

<sup>1</sup> comparative data from Scheuer & Black (ref. 68)

## S7. Comparative morphometric data

Linear measurements were taken using metric callipers; maximum lengths of humerus, tibia and femur were measured using an osteometric board. Circumferences were measured with a sliding osteometric ruler. All measurements were taken to the nearest millimetre. Angular measurements were obtained from digital images using ImageJ version 1.32J (National Institutes of Health, <http://isb.info.nih.gov/ij/>).

The extant comparative series includes adult and subadult samples of modern *Homo sapiens*, *Pan troglodytes*, *Gorilla gorilla*, and *Pongo pygmaeus*. Samples are from the Royal Museum of Central Africa (Tervuren, Belgium), the National Museum of Natural History, Paris, and the Anthropological Institute of the University of Zurich. The modern human samples are from the archaeological sites of Karagunduz (Ankara University, Turkey) and the Necropoles of Isola Sacra, Taforalt and Afalou (Institut de Paléontologie Humaine, National Museum of Natural History, Paris).

Linear osteometric dimensions follow the definitions of Martin and Saller<sup>69</sup>. In the scapular, glenoid orientation relative to the spine corresponds to the angle between the base of the spine and the long axis of the glenoid cavity<sup>70</sup>. The glenocoracoid angle expresses the orientation of the distal extremity of the coracoid process in relation to the main axis of the glenoid cavity. In the humerus, the position of the lateral condyle is measured by the ratio between the height of the capitulum and the height of the lateral epicondyle. Because humeral heads are not preserved in the Dmanisi sample, torsion was measured on the diaphyses. Using a Microscribe 3DX digitizer, four landmarks were determined on the proximal and distal extremes of the diaphysis: on the proximal end, the most salient point in the middle of the greater tubercle (A) and the most posterior point on the anatomical neck (B); on the distal end, the most salient points on the lateral (C) and medial (D) epicondyles. Torsion was defined as the angle between vectors (A-B) and (C-D). Vertebral zygapophyseal orientation was measured, in posterior view, as the angle between the midsagittal line and a line parallel to the prezygapophyseal articular surface<sup>71</sup>. In C2, the anterior angle of the superior articular process was measured in anterior view between lines parallel to the left and right articular surfaces.

Supplementary Table S4. Univariate comparison of postcranial elements<sup>1</sup>.

| Measurements <sup>2</sup>                                | australopiths <sup>3</sup>                | earliest <i>Homo</i> <sup>3</sup> | Dmanisi             | KNM-WT15000 | <i>Homo sapiens</i> <sup>3</sup>  | <i>Pan troglodytes</i> <sup>3</sup> | <i>Gorilla gorilla</i> <sup>3</sup> |
|----------------------------------------------------------|-------------------------------------------|-----------------------------------|---------------------|-------------|-----------------------------------|-------------------------------------|-------------------------------------|
| <b>Scapula</b>                                           |                                           |                                   |                     |             |                                   |                                     |                                     |
| Olecranon direction relative to midaxillary border (M17) | 116.0 – 115.0<br>2 <sup>4</sup>           | -                                 | 129.0               | 127.0       | 141.7±4.7<br>133.8 – 154.0<br>30  | 117.7±5.8<br>107.7 – 128.9<br>30    | 121.8±5.3<br>113.3 – 132.3<br>29    |
| Coracoid process width to length ratio                   | -                                         | -                                 | 41.2                | -           | 33.1±2.9<br>28.4 – 38.6<br>30     | 38.15±3.9<br>31.5 – 48.9<br>30      | 44.8±6.2<br>32.1 – 57.2<br>29       |
| Coracoid process width                                   |                                           |                                   | 13.5                |             | 15.5±1.7<br>11.0 – 19.0<br>30     | 15.9±1.7<br>13.1 – 19.2<br>30       | 28.2±5.8<br>19.2 – 42.1<br>30       |
| Coracoid process length                                  |                                           |                                   | 32.8                |             | 49.9±4.8<br>37.0 – 54.9<br>30     | 41.9±2.9<br>37.5 – 49.9<br>30       | 63.1±9.3<br>48.0 – 83.3<br>30       |
| Spine process breadth to width ratio                     | -                                         | -                                 | 54.0                | 57.7        | 55.2±5.5<br>42.5 – 65.4<br>30     | 16.2±4.1<br>10.9 – 27.9<br>30       | 16.6±3.2<br>10.6 – 23.0<br>29       |
| Length of spine                                          |                                           |                                   | 26.3                | 39.53       | 49.3±5.9<br>36.9 – 59.2<br>30     | 45.8±4.9<br>37.2 – 54.8<br>30       | 67.3±12.2<br>48.2 – 83.1<br>29      |
| Width of spine                                           |                                           |                                   | 14.2                | 22.8        | 27.0±3.0<br>22.0 – 32.8<br>30     | 7.31±1.5<br>5.0 – 12.1<br>30        | 11.3±2.7<br>6.8 – 17.4<br>30        |
| Glenoid orientation relative to the spine                | -                                         | -                                 | 81.0                | 75.0        | 89.4±6.5<br>79.9 – 102.9<br>30    | 55.8±7.2<br>41.0 – 67<br>30         | 59.0±9.6<br>40.0 – 78.5<br>29       |
| Glenocoracoid angle                                      |                                           |                                   | 55.0                | 59.5        | 82.5±7.6<br>60.0 – 94.5<br>29     | 48.78±7.1<br>31.0 – 64.5<br>30      | 45.1±12.0<br>20.0 – 68.0<br>38      |
| <b>Clavicle</b>                                          |                                           |                                   |                     |             |                                   |                                     |                                     |
| Length                                                   | -                                         | 149.4 <sup>5</sup>                | 137.03 – 135.6<br>2 | 130.5       | 137.0±10.9<br>113.0 – 159.0<br>50 | 118.0±11.5<br>97.4 – 140.2<br>33    | 148.5±15.3<br>126.9 – 161.2<br>27   |
|                                                          |                                           |                                   | 123.2               |             | 127.2±7.4<br>113.6 – 139.0<br>13  | 106.09±8.3<br>93.5 – 117.6<br>8     | 148.6±15.3<br>126.9 – 181.2<br>8    |
| Shape at midshaft (a-p/s-i diameters)                    | -                                         | 79.0 <sup>5</sup>                 | 79.3 – 67.2<br>2    | 53.8        | 76.7±9.4<br>57.9 – 97.3<br>50     | 70.75±10.3<br>46.6–89.7<br>33       | 71.0±10.4<br>54.9 – 100<br>27       |
|                                                          |                                           |                                   | 80.6                |             | 80.5±11.3<br>60.9 – 100<br>13     | 80.2±12.1<br>61.1 – 98.1<br>8       | 73.4±3.6<br>66.6 – 79.3<br>8        |
| Shape at conoid tubercle (a-p/s-i diameters)             | -                                         | 78.2 <sup>5</sup>                 | 80.6 – 80.2         | 85.1        | 60.7±11.3<br>40.9 – 92.3<br>50    | 42.1±4.7<br>33.1 – 52.6<br>33       | 52.6±5.5<br>38.9 – 62.6<br>27       |
|                                                          |                                           |                                   | 63.0                |             | 62.9±9.2<br>44.4 – 77.3<br>13     | 39.6±4.0<br>32.8 – 44.3<br>8        | 52.5±4.9<br>45.1 – 60.3<br>8        |
| <b>Humerus</b>                                           |                                           |                                   |                     |             |                                   |                                     |                                     |
| Length (M1)                                              | 235.0 – 226<br>2 <sup>6</sup>             | -                                 | 295.0               | 319.0       | 304.0±16.6<br>263.0 – 341.0<br>38 | 290.3±21.6<br>259.0 – 326.0<br>33   | 404.8±44.7<br>342.0 – 466.0<br>31   |
|                                                          |                                           |                                   | 282.2               |             | 298.2±22.7<br>255.0 – 334.0<br>27 | 272.7±21.0<br>234.0 – 296.0<br>8    | 403.6±40.3<br>367.5 – 441.0<br>6    |
| Torsion (M18)                                            | 122.7<br>111.0 – 130.0<br>4 <sup>7</sup>  | -                                 | 110.0               | 146.0       | 155.3±9.8<br>134.9 – 180.0<br>38  | 147.9±8.0<br>128.7 – 164.4<br>31    | 149.6±6.0<br>137.5 – 159.6<br>31    |
|                                                          |                                           |                                   | 104.0               |             | 150.8±5.9<br>138.2 – 160.7<br>23  | 147.7±6.1<br>136.6 – 155.1<br>8     | 152.6±4.7<br>144.5 – 158.8<br>6     |
| Lateral condyle position                                 | 91.5±4.7<br>85.0 – 98.4<br>7 <sup>8</sup> | 89.2 <sup>9</sup>                 | 85.8                |             | 112.5±11.1<br>92.1 – 132.3<br>38  | 76.9±6.5<br>62.0 – 86.9<br>29       | 73.1±4.7<br>63.1 – 81.6<br>27       |

| Measurements <sup>2</sup>                      | australopiths <sup>3</sup>           | earliest Homo <sup>3</sup>         | Dmanisi | KNM-WT15000 | Homo sapiens <sup>3</sup>           | Pan troglodytes <sup>3</sup>      | Gorilla gorilla <sup>3</sup>       |
|------------------------------------------------|--------------------------------------|------------------------------------|---------|-------------|-------------------------------------|-----------------------------------|------------------------------------|
|                                                |                                      |                                    | 76.0    |             | 109.0±15.3<br>78.1 – 131.3<br>21    | 103.7±14.6<br>78.0 – 120.0<br>8   | 66.6±6.5<br>61.0 – 77.7<br>6       |
| <b>Vertebrae</b>                               |                                      |                                    |         |             |                                     |                                   |                                    |
| C2 anterior angle of sup. art. proc.           | 107.0 – 120.0 <sup>210</sup>         | -                                  | 111.0   | -           | 136.0±6.4<br>129.1 – 147.2<br>10    | 110.5±3.2<br>106.4 – 115.1<br>6   | 112.3±1.4<br>110.8 – 114.3<br>6    |
| C2 canal shape (M11/M10)                       | -                                    | -                                  | 115.27  | -           | 121.4±9.9<br>131.9 – 108.7<br>10    | 90.9±4.5<br>85.1 – 97.7<br>6      | 78.0±6.4<br>69.8 – 85.9<br>6       |
| C3 canal shape (M11/M10)                       | -                                    | -                                  | 150.0   | -           | 130.5±14.4<br>113.7 – 160.0<br>10   | 83.1±7.3<br>73.7 – 93.0<br>6      | 98.3±5.0<br>90.7 – 105.4<br>6      |
| Zygapophyseal joint angles C2/C3               |                                      |                                    | 62.5    |             | 73.4±6.8<br>64.60 – 83.6<br>10      | 49.6±3.6<br>46.3 – 54.8<br>6      | 59.6±5.9<br>52.3 – 69.0<br>6       |
| Th3 canal shape (M11/M10)                      | -                                    | -                                  | 114.8   | 110.2       | 109.5±7.8<br>100.7 – 115.5<br>10    | 94.4±5.5<br>86.7 – 96.4<br>6      | 90.8±3.5<br>86.7 – 96.4<br>6       |
| Th10 canal shape (M11/M10)                     | -                                    | -                                  | 100.8   | 100.4       | 104.2±7.6<br>100.6 – 107.8<br>10    | 87.9±9.4<br>75.2 – 99.1<br>6      | 88.4±8.6<br>76.2 – 98.6<br>6       |
| Th10 centrum area (M4*M7)                      |                                      |                                    | 692.2   |             | 759.2±113.9<br>601.1 – 958.6<br>10  | 460.9±85.3<br>308.0 – 565.8<br>6  | 665.0±186.7<br>444.6 – 964.7<br>6  |
| Th10 centrum shape (M4/M7)                     |                                      |                                    | 111.6   |             | 136.0±13.6<br>113.1 – 153.1<br>10   | 121.5±9.3<br>106.9 – 131.7<br>6   | 126.6±10.8<br>114.6 – 150.0<br>6   |
| Th10 zygapophyseal joint angle Th10/Th11       |                                      |                                    | 107.6   |             | 106.4±4.6<br>100.0 – 113.4<br>10    | 109.1±4.1<br>105.3 – 115.4<br>6   | 114.6±3.6<br>111.0 – 119.7<br>6    |
| L1 canal shape (M11/M10)                       | -                                    | -                                  | 80.8    | -           | 87.7±8.0<br>74.8 – 101.0<br>10      | 115.2±6.8<br>105.6 – 126.3<br>6   | 120.1±11.8<br>104.6 – 133.3<br>6   |
| L1 centrum area (M4*M7)                        | -                                    | -                                  | 777.8   | 803.4       | 940.6±165.9<br>706.3 – 1288.9<br>10 | 772.4±95.9<br>575.4 – 836.9<br>6  | 878.0±284.8<br>610.0 – 1334.0<br>6 |
| Th10 centrum shape (M7/M4)                     |                                      |                                    | 114.2   |             | 148.8±9.0<br>134.5 – 169.1<br>10    | 133.5±9.2<br>120.0 – 143.4<br>6   | 153.7±9.7<br>140.2 – 166.7<br>6    |
| L1 zygapophyseal joint angle L1/L2             | 29.0 <sup>11</sup>                   |                                    | 45.6    |             | 31.6±5.3<br>24.5 – 40.0<br>10       | 34.4±4.8<br>26.8 – 38.9<br>6      | 72.5±9.3<br>61.6 – 84.2<br>6       |
| <b>Femur</b>                                   |                                      |                                    |         |             |                                     |                                   |                                    |
| Length (M1)                                    | 280.0 <sup>12</sup>                  | 401.0 – 396.0 <sup>213</sup>       | 386.0   | 432.0       | 381.9±22.9<br>337.0 – 434.0<br>22   | 290.2±15.9<br>252 – 318<br>30     | 350.1±40.8<br>294.0 – 423<br>30    |
| Medial to lateral condylar breadth (M21c/M21e) | 108.4<br>100.0 – 125.0 <sup>14</sup> | 87.7 – 107.9 <sup>213</sup>        | 103.9   | -           | 121.6±12.2<br>103.2 – 143.3<br>30   | 121.5±16.2<br>104.0 – 148.6<br>30 | 139.8±14.1<br>119.4 – 171.8<br>26  |
| Neck index (M16/M15)                           | 69.8<br>64.6 – 78.2 <sup>615</sup>   | 88.9 – 95.3 <sup>213</sup>         | 66.2    | 78.5        | 80.4±6.3<br>63.4 – 93.1<br>30       | 83.3±4.6<br>72.1 – 90.1<br>30     | 76.7±5.1<br>65.8 – 88.9<br>30      |
| Bicondylar angle (M30)                         | 77.0<br>75.0 – 81.0 <sup>716</sup>   | 77.0 – 80.0 <sup>213</sup>         | 81.5    | 80.0        | 80.3±2.8<br>76.0 – 88.0<br>30       | 89.3±2.9<br>85.0 – 96.2<br>30     | 89.5±2.2<br>85.0 – 95.0<br>30      |
| <b>Tibia</b>                                   |                                      |                                    |         |             |                                     |                                   |                                    |
| Length (M1a)                                   | -                                    | -                                  | 306.0   | 380.0       | 318.9±20.5<br>290.0 – 374.0<br>22   | 242.2±14.3<br>207.0 – 266.0<br>30 | 281.5±29.7<br>241.0 – 334.0<br>30  |
| Midshaft index (M9/M8)                         | -                                    | 70.1<br>63.9 – 81.5 <sup>317</sup> | 66.6    | 83.3        | 60.9±6.0<br>48.1 – 68.2<br>26       | 67.9±6.7<br>56.6 – 80.5<br>30     | 76.5±7.0<br>62.5 – 91.4<br>30      |
| Angle of torsion (M14)                         | -                                    | -                                  | 21.9    |             | 20.1±7.1<br>7.8 – 33.8<br>26        | 33.8±6.8<br>21.5 – 45.8<br>30     | 27.4±5.4<br>20.2 – 39.3<br>30      |

| Measurements <sup>2</sup>                | australopiths <sup>3</sup>                | earliest <i>Homo</i> <sup>3</sup> | Dmanisi            | KNM-WT15000 | <i>Homo sapiens</i> <sup>3</sup>  | <i>Pan troglodytes</i> <sup>3</sup> | <i>Gorilla gorilla</i> <sup>3</sup> |
|------------------------------------------|-------------------------------------------|-----------------------------------|--------------------|-------------|-----------------------------------|-------------------------------------|-------------------------------------|
| Angle of inclination (M13)               | -                                         | -                                 | 82.0               | -           | 97.2±4.6<br>89.1 – 111.7<br>26    | 75.1±4.5<br>65.4 – 82.7<br>30       | 82.5±4.4<br>72.3 – 90<br>30         |
| <b>Talus</b>                             |                                           |                                   |                    |             |                                   |                                     |                                     |
| Neck angle (M16)                         | 32.3<br>26.9 – 37.0<br>6 <sup>18</sup>    | 33.5 <sup>19</sup>                | 26.                | -           | 19.4±4.9<br>12.0 – 31.0<br>30     | 34.4±3.9<br>25.4 – 42.5<br>30       | 32.4±3.8<br>23.5 – 36.7<br>30       |
| <b>Metatarsals</b>                       |                                           |                                   |                    |             |                                   |                                     |                                     |
| Angle of torsion of metatarsal I (M11)   | -                                         | -                                 | 3 – 15<br>2        | -           | 13.9±7.1<br>3.5 – 32.0<br>30      | 40.1±17.4<br>24.2 – 54.5<br>28      | 47.5±10.8<br>31.4 – 68.9<br>30      |
| Index of shaft of metatarsal I (M3/M4)   | 105.8<br>102.9 – 111.6<br>3 <sup>20</sup> | -                                 | 102.6 – 106.8<br>2 | -           | 95.2±8.6<br>81.9 – 115.6<br>30    | 90.8±6.8<br>75.8 – 102.0<br>28      | 93.5±10.6<br>76.9 – 114.9<br>30     |
| Angle of torsion of metatarsal III (M11) | -                                         | 23.6 <sup>19</sup>                | 26.9 – 21.7<br>2   | -           | 17.5±6.1<br>5.0 – 30.0<br>30      | 13.3±3.0<br>8.6 – 19.5<br>27        | 12.6±3.4<br>4.7 – 19.7<br>30        |
| Index of shaft of metatarsal III (M3/M4) | -                                         | 63.1 – 75.3<br>2 <sup>21</sup>    | 69.4 – 87.3<br>2   | -           | 91.1±9.5<br>72.8 – 107.0<br>30    | 74.1±6.1<br>64.5 – 86.6<br>27       | 74.1±8.4<br>53.7 – 90.9<br>30       |
| Angle of torsion of metatarsal IV (M11)  | -                                         | 28.2 <sup>19</sup>                | 27.8 – 29.0<br>2   | -           | 18.7±6.7<br>1.5 – 30.0<br>30      | 8.9±3.0<br>3.5 – 14.9<br>24         | 9.9±3.8<br>3.6 – 18.9<br>30         |
| Index of shaft of metatarsal IV (M3/M4)  | -                                         | 80.7 <sup>19</sup>                | 68.1 – 75.5        | -           | 99.6±11.4<br>78.3 – 122.1<br>30   | 86.5±7.2<br>73.9 – 106.6<br>30      | 75.1±8.7<br>57.6 – 100.3<br>30      |
| Angle of torsion of metatarsal V (M11)   | -                                         | -                                 | 6.7                | -           | 11.7±6.4<br>2.8 – 27.8<br>30      | 13.2±3.8<br>5.8 – 23.4<br>30        | 15.9±5.6<br>5.9 – 26.4<br>30        |
| Index of shaft of metatarsal V (M3/M4)   | 102.73 <sup>22</sup>                      | 127.80 <sup>19</sup>              | 135.4              | -           | 136.9±11.0<br>116.1 – 156.7<br>30 | 114.2±12.4<br>90.1 – 131.7<br>30    | 93.9±16.7<br>68.9 – 131.9<br>30     |

<sup>1</sup>Linear measurements are in mm, angular measurements are in degrees; <sup>2</sup>Measurement codes according to Martin (ref. 69); <sup>3</sup>Measurements are represented by mean ± std.dev., range, and sample size; data for subadults are in italics; <sup>4</sup>Sts7, AL288-1; <sup>5</sup>OH48; <sup>6</sup>AL288-1, Bou-VP-12/1; <sup>7</sup>AL288-1, ER739, Sts7, Omo119; <sup>8</sup>AL288-1, AL137-48, AL322-1, KP271, ER739, TM1517, Stw431c; <sup>9</sup>ER1504; <sup>10</sup>AL333-101, SK-854; <sup>11</sup>Sts-14f; <sup>12</sup>AL288-1; <sup>13</sup>ER1481, ER1472; <sup>14</sup>AL129, AL333-4, Sts34, TM1513; <sup>15</sup>AL288-1, AL333-3, AL333-95, F.SK26, SK82, ER1505; <sup>16</sup>AL288-1, AL129-1a, AL333-4, AL333w-56, Sts34, TM1513, ER993; <sup>17</sup>HO35a, KNM-ER813a, KNM-ER741; <sup>18</sup>AL288-1, TM1517, ER1476a, ER813, ER1464, Stw573; <sup>19</sup>OH8; <sup>20</sup>SK1813, SKX5017, Stw562; <sup>21</sup>KNM-ER1823, OH8; <sup>22</sup>AL333-13.

## S8. Estimates of stature, body mass and encephalization quotient (EQ)

Limb proportions of the Dmanisi hominins, measured by femoro-tibial and humero-femoral ratios are similar to those of modern humans. It is thus sensible to use modern human prediction equations to estimate body mass (Table S5) and stature (Table S6) of the Dmanisi hominins.

Body mass estimates were calculated using the equations for femur, humerus, tibia, and metatarsal I<sup>72</sup>. The inferred body mass of the large adult individual is between 47.6 kg and 50.0 kg. The body mass of the small adult individual, calculated from the first metatarsal (D2671)<sup>72</sup> is 40.2 kg. Based on humeral and femoral dimensions, the body mass of the subadult is between 40.0 kg and 42.5 kg.

Stature estimates for the subadult Dmanisi individual were obtained with prediction equations for juvenile samples<sup>42</sup>; estimates based on humeral length (D2680) yield a value between 144.9 cm and 161.4 cm. Stature estimates for the large adult individual were obtained from humeral, femoral, and tibial dimensions<sup>73, 74</sup>, yielding a range of 146.6 cm – 166.2 cm. Stature estimates based on the length of the first metatarsal (D3442)<sup>75</sup> yield a value of 143.0 cm.

Brain mass was estimated from endocranial volumes using the formula provided by Martin<sup>76</sup>. The encephalization quotient was evaluated according to the formula provided by Martin<sup>77</sup>, using 95% confidence ranges for body mass estimates of each individual (Table S7).

Supplementary Table S5. Estimation of body mass in Dmanisi individuals

| specimen                    | Dimension1<br>(mm) | Dimension2<br>(mm) | Estimated<br>body mass<br>(kg) | 95%<br>confidence<br>interval<br>(kg) | 95%<br>confidence<br>range (kg) | Comparative<br>modern human<br>sample | Data<br>source<br>(ref.#) |    |
|-----------------------------|--------------------|--------------------|--------------------------------|---------------------------------------|---------------------------------|---------------------------------------|---------------------------|----|
| <b><i>Subadult</i></b>      |                    |                    |                                |                                       |                                 |                                       |                           |    |
| Elbow                       | D2680              | 38.0 <sup>1</sup>  | 14.4 <sup>2</sup>              | 38.5                                  | 1.3                             | 37.2 - 39.8                           | female                    | 41 |
|                             |                    | 38.0 <sup>1</sup>  | 14.4 <sup>2</sup>              | 38.5                                  | 1.3                             | 37.2 - 39.8                           | male                      | 41 |
| Femoral shaft               | D3160              | 21.4 <sup>3</sup>  | 25.3 <sup>4</sup>              | 44.0                                  | 1.2                             | 42.8 - 45.2                           | female                    | 41 |
|                             |                    | 21.4 <sup>3</sup>  | 25.3 <sup>4</sup>              | 44.0                                  | 1.2                             | 42.8 - 45.2                           | male                      | 41 |
| <b>Average</b>              |                    |                    | <b>41.2</b>                    |                                       | <b>40.0 - 42.5</b>              |                                       |                           |    |
| <b><i>Adult (large)</i></b> |                    |                    |                                |                                       |                                 |                                       |                           |    |
| Elbow                       | D4507              | 40.2 <sup>1</sup>  | 17.9 <sup>2</sup>              | 48.9                                  | 1.3                             | 47.6 - 50.2                           | female                    | 41 |
|                             |                    | 40.2 <sup>1</sup>  | 17.9 <sup>2</sup>              | 48.9                                  | 1.3                             | 47.6 - 50.2                           | male                      | 41 |
| Femoral head                | D4167              | 40.0 <sup>5</sup>  |                                | 49.6                                  | 1.2                             | 48.4 - 50.8                           | female                    | 41 |
|                             |                    | 40.0 <sup>5</sup>  |                                | 49.6                                  | 1.2                             | 48.4 - 50.8                           | male                      | 41 |
| Proximal tibia              | D3901              | 40.5 <sup>6</sup>  | 67.3 <sup>7</sup>              | 48.1                                  | 1.1                             | 46.9 - 49.2                           | female                    | 41 |
|                             |                    | 40.5 <sup>6</sup>  | 67.3 <sup>7</sup>              | 48.1                                  | 1.1                             | 46.9 - 49.2                           | male                      | 41 |
| Distal tibia                | D3901              | 27.1 <sup>8</sup>  | 26.0 <sup>9</sup>              | 48.6                                  | 1.2                             | 47.4 - 49.8                           | female                    | 41 |
|                             |                    | 27.1 <sup>8</sup>  | 26.0 <sup>9</sup>              | 48.6                                  | 1.2                             | 47.4 - 49.8                           | male                      | 41 |
| <b>Average</b>              |                    |                    | <b>48.8</b>                    |                                       | <b>47.6 - 50.0</b>              |                                       |                           |    |
| <b><i>Adult (small)</i></b> |                    |                    |                                |                                       |                                 |                                       |                           |    |
| MT I base                   | D3442              | 22.3 <sup>10</sup> | 16.4 <sup>11</sup>             | 39.7                                  |                                 |                                       | composite                 | 72 |
| MT I head                   | D3442              | 15.7 <sup>12</sup> | 16.3 <sup>13</sup>             | 40.7                                  |                                 |                                       | composite                 | 72 |
| <b>Average</b>              |                    |                    | <b>40.2</b>                    |                                       |                                 |                                       |                           |    |

<sup>1</sup>articular width of the distal humerus; <sup>2</sup>capitular height; <sup>3,4</sup>antero-posterior and transversal diameters of the femoral shaft, taken just inferior to the lesser trochanter; <sup>5</sup>maximum supero-inferior diameter of the femoral head; <sup>6,7</sup>antero-posterior and transversal diameter respectively of the proximal tibia; <sup>8,9</sup>antero-posterior and transversal diameter respectively of the talar facet on the distal tibia; <sup>10,11</sup>medio-lateral and dorsoplantar diameter respectively of the base of metatarsal I; <sup>12,13</sup>medio-lateral and dorsoplantar diameter respectively of the head of metatarsal.

Supplementary Table S6. Estimation of stature in Dmanisi individuals

|                      |       | Length<br>(cm) | Stature<br>estimate<br>(cm) | 95% confidence<br>interval (cm) | 95% confidence<br>range (cm) | Comparative<br>sample | data<br>source<br>(ref. #) |
|----------------------|-------|----------------|-----------------------------|---------------------------------|------------------------------|-----------------------|----------------------------|
| <i>Subadult</i>      |       |                |                             |                                 |                              |                       |                            |
| Humerus              | D2680 | 28.2           | 152.7                       | 8.6                             | 144.1 - 161.4                | subadult (12y)        | 42                         |
|                      |       | 28.2           | 153.5                       | 7.9                             | 145.6 - 161.5                | subadult (13y)        | 42                         |
| <b>Average</b>       |       |                | <b>153.1</b>                |                                 | <b>144.9 - 161.4</b>         |                       |                            |
| <i>Adult (large)</i> |       |                |                             |                                 |                              |                       |                            |
| Humerus              | D4507 | 29.5           | 161.5                       | 11.1                            | 150.4 - 172.5                | Caucasian (m)         | 73                         |
|                      |       | 29.5           | 159.6                       | 9.6                             | 149.9 - 169.2                | Caucasian (f)         | 73                         |
|                      |       | 29.5           | 159.6                       | 10.4                            | 149.2 - 169.9                | African (m)           | 73                         |
|                      |       | 29.5           | 158.0                       | 9.2                             | 148.8 - 167.3                | African (f)           | 73                         |
|                      |       | 29.5           | 145.7                       |                                 |                              | African (m)           | 78                         |
|                      |       | 29.5           | 143.0                       |                                 |                              | African (f)           | 78                         |
| Femur                | D4167 | 38.6           | 154.5                       | 9.2                             | 145.3 - 163.7                | Caucasian (m)         | 73                         |
|                      |       | 38.6           | 152.6                       | 8.6                             | 144.1 - 161.2                | Caucasian (f)         | 73                         |
|                      |       | 38.6           | 155.7                       | 11.2                            | 144.4 - 166.9                | African (m)           | 73                         |
|                      |       | 38.6           | 151.2                       | 8.3                             | 142.8 - 159.5                | African (f)           | 73                         |
|                      |       | 38.6           | 138.5                       |                                 |                              | African (m)           | 78                         |
|                      |       | 38.6           | 134.3                       |                                 |                              | African (f)           | 78                         |
| Tibia                | D3901 | 30.0           | 157.2                       | 10.0                            | 147.2 - 167.3                | Caucasian (m)         | 73                         |
|                      |       | 30.0           | 153.6                       | 10.3                            | 143.3 - 163.9                | African (m)           | 73                         |
|                      |       | 30.0           | 133.6                       |                                 |                              | African (m)           | 78                         |
|                      |       | 30.0           | 130.5                       |                                 |                              | African (f)           | 78                         |
| <b>Average</b>       |       |                | <b>149.3</b>                |                                 | <b>146.6 - 166.2</b>         |                       |                            |
| <i>Adult (small)</i> |       |                |                             |                                 |                              |                       |                            |
| Mt I                 | D3442 | 4.74           | <b>143.0</b>                |                                 |                              | Combined data         | 75                         |

Supplementary Table S7. Estimation of encephalization quotient (EQ)

| Individual  | Estimated brain<br>mass (g) | Estimated average<br>body mass (kg) | EQ   |
|-------------|-----------------------------|-------------------------------------|------|
| subadult    | 560                         | 41.2                                | 2.96 |
|             |                             | 49.4 <sup>1</sup>                   | 2.57 |
| large adult | 632 <sup>2</sup>            | 48.8                                | 2.94 |
| small adult | 582                         | 40.2                                | 3.13 |

<sup>1</sup> estimated body mass at adulthood (120% of 41.2 kg)

<sup>2</sup> average of D2280, D2700, and D3444



### **S9. Character states identified in the Dmanisi postcranial remains**

Table S8 summarizes states for characters identified on the Dmanisi postcranial remains and provides a tentative ordering of character states from primitive (dark shading) versus derived (light shading or white). The Dmanisi hominins exhibit an array of symplesiomorphic characters that group them with australopiths and earliest *Homo*, while KNM-WT15000 appears more derived in several features. KNM-WT15000 and Dmanisi share an array of synapomorphies with modern humans but are more primitive than modern humans in most features.

Supplementary Table S8. Character states of Dmanisi postcranial elements

|                                                     | chimpanzees           | australopiths | earliest<br><i>Homo</i> | Dmanisi               | <i>H. erectus</i><br>(WT15000) | modern<br>humans           |
|-----------------------------------------------------|-----------------------|---------------|-------------------------|-----------------------|--------------------------------|----------------------------|
| <b>Scapula</b>                                      |                       |               |                         |                       |                                |                            |
| orientation of glenoid cavity                       | cranial               | cranial       | -                       | cranial               | cranial                        | lateral                    |
| l/w ratio of coracoid process                       | high                  | -             | -                       | high                  | -                              | low                        |
| glenocoracoid angle                                 | narrow                | -             | -                       | narrow                | narrow                         | wide                       |
| b/l ratio of spine                                  | low                   | -             | -                       | high                  | high                           | high                       |
| <b>Clavicle</b>                                     |                       |               |                         |                       |                                |                            |
| shaft length relative to humeral length             | long                  | -             | -                       | middle                | middle                         | short                      |
| shape of conoid tubercle (relative a-p diameter)    | small                 | -             | large                   | large                 | large                          | large                      |
| <b>Humerus</b>                                      |                       |               |                         |                       |                                |                            |
| position of lateral epicondyle rel. to lat. condyle | high                  | middle        | middle                  | middle                | -                              | low                        |
| degree of torsion                                   | high                  | low           | -                       | low                   | middle                         | high                       |
| <b>Vertebrae</b>                                    |                       |               |                         |                       |                                |                            |
| canal shape (direction of greatest width)           | dorsoventral          | transversal   | -                       | transversal           | transversal                    | transversal                |
| C2 spinal process                                   | long                  | short         | -                       | short                 | -                              | short                      |
| C2 sup. articular surface angle                     | narrow                | narrow        | -                       | narrow                | -                              | wide                       |
| Th&L centrum area relative to body mass             | small                 | middle        | -                       | middle                | middle                         | large                      |
| thoracic zygapophyseal joint angle                  | wide                  | middle        | -                       | middle                | wide                           | narrow                     |
| lumbar zygapophyseal joint angle                    | narrow                | narrow        | -                       | slightly wide         | narrow                         | narrow                     |
| wedging of lumbar vertebrae                         | anterior              | posterior     | -                       | posterior             | posterior                      | posterior                  |
| <b>Femur</b>                                        |                       |               |                         |                       |                                |                            |
| elevation of greater trochanter                     | high                  | middle        | middle                  | middle                | -                              | low                        |
| bicondylar angle                                    | wide                  | narrow        | narrow                  | narrow                | narrow                         | narrow                     |
| <b>Tibia</b>                                        |                       |               |                         |                       |                                |                            |
| rel. size of joint surfaces                         | large                 | -             | -                       | large                 | -                              | small                      |
| degree of torsion                                   | high                  | -             | -                       | low                   | -                              | low                        |
| <b>Talus</b>                                        |                       |               |                         |                       |                                |                            |
| neck angle                                          | wide                  | middle        | middle                  | middle                | -                              | narrow                     |
| flexor hallucis longus groove                       | deep, longitudinal    | -             | -                       | shallow, oblique      | -                              | shallow, vertical          |
| medial tubercles                                    | 2 prominent tubercles | -             | -                       | 2 prominent tubercles | -                              | prominent lateral tubercle |
| <b>Metatarsals</b>                                  |                       |               |                         |                       |                                |                            |
| Mt1 torsion                                         | wide                  | -             | -                       | narrow                | -                              | narrow                     |
| Mt I head size                                      | small                 | large         | large                   | large                 | -                              | large                      |
| Mt III, IV shaft torsion                            | narrow                | -             | wide                    | wide                  | -                              | wide                       |
| transversal and longitudinal pedal arching          | absent                | -             | present                 | present               | -                              | present                    |
| <b>Body dimensions</b>                              |                       |               |                         |                       |                                |                            |
| limb proportions (humerus/femur ratio)              | high                  | middle        | low                     | low                   | low                            | low                        |
| body mass                                           | low                   | low           | middle                  | middle                | high                           | high                       |
| EQ                                                  | 2.38                  | 2.4 – 3.1     | 3.1                     | 2.7 – 2.8             | 2.7 – 3.8                      | 6.28                       |

**Supplementary References (continued from main text)**

51. Fortelius, M., Werdelin, L., Andrews, P., Bernor, R. L., Gentry, A. *et al.* in *The Evolution of Western Eurasian Neogene Mammal Faunas* (eds. Bernor, R. L., Fahlbusch, V. & Mittmann, H.-W.) 414-448 (Columbia University Press, New York, 1996).
52. Simpson, C. G. Mammals and the nature of continents. *Am. J. Sci.* **241**, 1-31 (1943).
53. Sokal, R. R. & Sneath, P. H. A. *Principles of Numerical Taxonomy* (Freeman and Co, San Francisco, 1963).
54. Archer, A. W. & Maples, C. G. Monte Carlo simulation of selected binomial similarity coefficients: effect of number of variables. *Palaios* **2**, 609-617 (1987).
55. Maples, C. G. & Archer, A. W. Monte Carlo simulation of selected binomial similarity coefficients (2): effect of sparse data. *Palaios* **3**, 95-103 (1988).
56. Bernor, R. L. in *New Interpretations of Ape and Human Ancestry* (eds. Ciochon, R. L. & Corruccini, R.) 21-64 (Plenum Press, New York, 1983).
57. Flynn, L. Faunal provinces and the Simpson coefficient. *Contrib. Geology, Univ. Wyoming Spec.* **3**, 317-338 (1986).
58. Bernor, R. L. & Rook, L. in *Recent Advances on Multidisciplinary Research at Rudabánya, Late Miocene (MN9), Hungary: a Compendium* (eds. Bernor, R. L., Kordos, L. & Rook, L.) 21-25 (Palaeontographia Italica, Pisa, 2003).
59. Turner, A. e. a. in *African Biogeography, Climate Change and Human Evolution* (eds. Bromage, T. G. & Schrenk, F.) 369-399 (Oxford University Press, 1999).
60. Tappen, M., Lordkipanidze, D., Bukshianidze, M., Vekua, A. & Ferring, R. in *African Taphonomy: A Tribute to the Career of C.K. "Bob" Brain* (eds. Pickering, T. R., Schick, K. & Toth, N.) (Oxford University Press, Bloomington, Indiana,, 2006).
61. Behrensmeyer, A. K. Taphonomic and ecologic information from bone weathering. *Paleobiology* **2**, 150-162 (1978).
62. Brain, C. K. *The Hunters or the Hunted* (University of Chicago Press, Chicago, 1981).
63. Villa, P. & Mahieu, E. Breakage patterns of human long bones. *J. Hum. Evol.* **21**, 27-48 (1991).
64. Horwitz, L. & Smith, P. in *Proceedings of the 1993 Bone Modification Conference* (eds. Hannus, L., Rossum, L. & Winham, R.) 188-194 (Archeology Laboratory, Augustana College, Hot Springs, South Dakota, 1993).
65. Horwitz, L. K. & Smith, P. The effects of striped hyaena activity on human remains. *J. Archaeol. Sci.* **15**, 471 - 481 (1988).
66. Haglund, W. D. & Sorg, M. H. *Forensic Taphonomy: the Postmortem Fate of Human Remains* (CRC Press LLC, Boca Raton, 1996).
67. Pickering, T. Carnivore voiding: A taphonomic process with the potential for the deposition of forensic evidence. *J. Archaeol. Sci.* **46**, 401-411 (2001).
68. Scheuer, L., Black, S. & Christie, A. *Developmental Juvenile Osteology* (Academic Press, California, 2000).
69. Martin, R. *Lehrbuch der Anthropologie in systematischer Darstellung mit besonderer Berücksichtigung der anthropologischen Methoden* (Fischer, Stuttgart, 1957-1966).

70. Etter, H. F. L'omoplate des primates supérieurs, la relation entre sa forme et sa fonction. *Archives Suisses d'Anthropologie Générale (Genève)* **48**, 31-51 (1984).
71. Singer, K. P., Breidahl, P. D. & Day, R. E. Variations in zygapophyseal joint orientation and level of transition at the thoracolumbar junction. *Surg. Radiol. Anat.* **10**, 291-295 (1988).
72. McHenry, H. M. & Berger, L. R. Body proportions of *Australopithecus afarensis* and *A. africanus* and the origin of the genus *Homo*. *J. Hum. Evol.* **35**, 1-22 (1998).
73. Trotter, M. & Gleser, G. C. Estimation of stature from long bones of American Whites and Negroes. *Am J Phys Anthropol* **10**, 463-514 (1952).
74. Duyar, I. & Pelin, C. Body height estimation based on tibia length in different stature groups. *Am. J. Phys. Anthropol.* **122**, 23-27 (2003).
75. Byers, S., Akoshima, K. & Curran, B. Determination of adult stature from metatarsal length. *Am. J. Phys. Anthropol.* **79**, 275-279 (1989).
76. Martin, R.D. Adaptation and body size in primates. *Z. Morphol. Anthropol.* **71**, 115-124 (1980).
77. Martin, R. D. Relative brain size and basal metabolic rate in terrestrial vertebrates. *Nature* **293**, 57-60 (1981).
78. Lundy, J. K. & Feldesman, M. R. Revised equation for estimating living stature from the long bone of the South African Negro. *S. Afr. J. Sci.* **83**, 54-55 (1987).
